# Supplementary material for: Glucose controls manganese homeostasis through transcription factors regulating known and newly identified manganese transporter genes in Bacillus subtilis
Source: PubMed Central journal article supplement (PMC10448178; doi:10.1016/j.jbc.2023.105069), 2023-07-17
Supplement: mmc1.pdf [file mmc1.pdf]

# **Glucose controls manganese homeostasis through transcription factors regulating known and newly-identified manganese transporter genes in *Bacillus subtilis***

Mitsuo Ogura, Minenosuke Matsutani, Kei Asai and Michio Suzuki

## **Supplementary Methods**

### **Plasmid construction**

To construct pUKM504-ywID and pUKM504-mneS, PCR products were amplified by using the oligonucleotide pairs pUKM-ywID-F-B/pUKM-ywID-R-H and pUKM-ydxT-F-B/pUKM-ydxT-R-H, digested with BamHI/HindIII, and cloned into pUKM504 treated with the same enzymes (60). To construct pUKM504-yknV, pUKM504-mntA, and pUKM504-kipR, PCR products were amplified by using the oligonucleotide pairs pUKM-yknV-F-B/pUKM-yknV-R-Sa, pUKM-ytgA-F-B/pUKM-ytgA-R-Sa, and pUKM-kipR-F-B/pUKM-kipR-R-Sa, digested with BamHI/SalI, and cloned into pUKM504 treated with the same enzymes (60). To construct pIS284-ywIDE, pIS284-ywIDE+E, pIS284-argG, pIS284-pyrR, pIS284-mgtE, and pIS284-czcD, the PCR products amplified by using the oligonucleotide pairs pIS-PywID-F(E)/pIS-PywID-R(B), pIS-PywID-F(E)/pMut-PywIE-F(B), pIS-argG-E/pIS-argG-B, pIS-pyrR-F(E)/pIS-pyrR-R(B), pIS-mgtE-E/pIS-mgtE-B, and pIS-czcD-E/pIS-czcD-B, were digested with EcoRI/BamHI and cloned into pIS284 treated with the same enzymes (61). To construct pIS284-ycsF-Wt, pIS284-dhbA, and pIS284-feuA, the PCR products amplified by using the oligonucleotide pairs pIS-ycsF-E/pIS-ycsF-H-bio, pIS-dhbA-E/pIS-dhbA-H, and pIS-feuA-E/pIS-feuA-H were digested with EcoRI/HindIII and cloned into pIS284 treated with the same enzymes (62). The derivatives of pIS-ycsF-Wt were constructed by the similar methods to that described above using different oligonucleotide pairs shown in Table S3. To construct pIS-mntH-Wt, pIS284-argC and pIS-hom, the PCR products amplified by using the oligonucleotide pairs pIS-ydaR-B/pIS-ydaR-H, pIS-argC-B/pIS-argC-H and pIS-hom-B/pIS-hom-H, were digested with BamHI/HindIII and cloned into pIS284 treated with the same enzymes (62). The derivatives of pIS-mntH-Wt were constructed by the similar methods to that described above using different oligonucleotide pairs shown in Table S3. To construct pMutin-PmntA, pMutin-PmneP, pMutin-PmneS, and pMutin-PyknU, PCR products were amplified by

using the oligonucleotide pairs pIS-ytgA-E/pIS-ytgA-B, pMut-ydfM-E/pMut-ydfM-B, pMut-ydxt-E/pMut-ydxt-B, and pIS-yknU-E/pMut-PyknU-B digested with EcoRI/HindIII, and cloned into pMUTIN3 treated with the same enzymes (37). To construct pMutin-PmntH, PCR products amplified by using the oligonucleotide pair pMut-ydaR-H/pMut-ydaR-B were digested with BamHI/HindIII and cloned into pMUTIN3 treated with the same enzymes (37). To construct pMUTIN-His-mntH, PCR products were amplified by using the oligonucleotide pair pMut-His-ydaR-H/pMut-His-ydaR-E, digested with HindIII/EcoRI, and cloned into pMUTIN-His treated with the same enzymes (63). To construct pMUTIN-His-ycsF, PCR products were amplified by using the oligonucleotide pair PMut-His-ycsF-F-E/PMut-His-ycsF-R-Xh, digested with EcoRI/XhoI, and cloned into pMUTIN-His treated with the same enzymes (63). To construct pMUTIN-His-ycsG, PCR products were amplified by using the oligonucleotide pair PMut-His-ycsG-F-H/PMut-His-ycsG-R-Xh, digested with HindIII/XhoI, and cloned into pMUTIN-His treated with the same enzymes (63). To construct pX-yknV and pX-ycsG, PCR products were amplified by using the oligonucleotide pairs pX-yknV-Spe/pX-yknV-Bam and pX-ycsG-Spe/pX-ycsg-Bam, digested with BamHI/SpeI, and cloned into pX treated with the same enzymes (40). To construct pGEX-4T1-ahrC and pGEX-4T1-mntR, PCR products were amplified by using the oligonucleotide pairs ahrC-His-B/ahrC-chitin-R (Xh) and pGEX-mntR-B/mntR-chitin-R (Xh), digested with BamHI/XhoI, and cloned into pGEX-4T1 treated with the same enzymes (Qiagen, Hilden, Germany).

### Strain construction

The *ycsG*::Sp<sup>r</sup> unit in OAM1032 was constructed using PCR. Briefly Sp<sup>r</sup> from pDG1729 (64) and the upstream and downstream regions of *ycsG* with overlapping regions to Sp<sup>r</sup> were amplified using primers listed in Table S4 and then combined by PCR. The unit was transformed into *B. subtilis* 168. Total DNA was taken from the resultant Sp<sup>r</sup> strain for PCR-based confirmation of the expected chromosomal structure.

**Table S1 (Excel file).** Differentially-expressed genes in *ahrC* and *mntR* strains. Red (FDR, <0.05, log<sub>2</sub>[FC], 1), Green (FDR, <0.001, log<sub>2</sub>[FC], 1), Blue (FDR, <0.001, log<sub>2</sub>[FC], 2).

Table S2. Strains and plasmids used in the study.

| Strain  | Genotype                                                                                                                                                                                            | Reference or source |
|---------|-----------------------------------------------------------------------------------------------------------------------------------------------------------------------------------------------------|---------------------|
| 168     | <i>trpC2</i>                                                                                                                                                                                        | Laboratory stock    |
| OAM992  | <i>trpC2 mntA</i> (Km <sup>r</sup> ) <i>mntH</i> (Em <sup>r</sup> , <i>lacZ</i> ::Tc <sup>r</sup> )                                                                                                 | This study          |
| OAM993  | <i>trpC2 mneP</i> (Em <sup>r</sup> , <i>lacZ</i> ::Tc <sup>r</sup> )                                                                                                                                | This study          |
| OAM994  | <i>trpC2 mneS</i> (Km <sup>r</sup> )                                                                                                                                                                | This study          |
| TF4     | <i>trpC2 ahrC</i> (Cm <sup>r</sup> )                                                                                                                                                                | 65                  |
| OAM995  | <i>trpC2 ahrC</i> (Cm <sup>r</sup> ::Km <sup>r</sup> )                                                                                                                                              | This study          |
| OAM996  | <i>trpC2 mntR</i> (Em <sup>r</sup> )                                                                                                                                                                | This study          |
| OAM997  | <i>trpC2 ywlD</i> (Km <sup>r</sup> )                                                                                                                                                                | This study          |
| TF10    | <i>trpC2 ccpA</i> (Cm <sup>r</sup> )                                                                                                                                                                | 65                  |
| YQZBd   | <i>trpC2 ccpN</i> (Em <sup>r</sup> )                                                                                                                                                                | 66                  |
| OAM998  | <i>trpC2 ccpN</i> (Em <sup>r</sup> , <i>lacZ</i> ::Tc <sup>r</sup> )                                                                                                                                | This study          |
| YKNUd   | <i>trpC2 yknU</i> ( <i>lacZ</i> , Pspac- <i>yknV</i> , Em <sup>r</sup> )                                                                                                                            | 61                  |
| OAM999  | <i>trpC2 yknV</i> (Km <sup>r</sup> )                                                                                                                                                                | This study          |
| YKNXd   | <i>trpC2 yknX</i> ( <i>lacZ</i> , Pspac- <i>yknY</i> , Em <sup>r</sup> )                                                                                                                            | 66                  |
| OAM1032 | <i>trpC2 yesG</i> (Sp <sup>r</sup> )                                                                                                                                                                | This study          |
| OAM1088 | <i>trpC2 kipR</i> (Km <sup>r</sup> )                                                                                                                                                                | This study          |
| OAM1033 | <i>trpC2 amyE</i> ::PxyI- <i>yesG</i> , <i>xyIR</i> (Cm <sup>r</sup> )                                                                                                                              | This study          |
| OAM1034 | <i>trpC2 yesG</i> (Cm <sup>r</sup> ) <i>amyE</i> ::PxyI- <i>yesG</i> , <i>xyIR</i> (Cm <sup>r</sup> )                                                                                               | This study          |
| OAM1035 | <i>trpC2 yesG</i> (Sp <sup>r</sup> ) <i>mntH</i> (Em <sup>r</sup> , <i>lacZ</i> ::Tc <sup>r</sup> ) <i>mntA</i> (Km <sup>r</sup> ) <i>amyE</i> ::PxyI- <i>yesG</i> , <i>xyIR</i> (Cm <sup>r</sup> ) | This study          |
| OAM1000 | <i>trpC2 Pspac-mntH</i> (Em <sup>r</sup> )                                                                                                                                                          | This study          |
| OAM1001 | <i>trpC2 Pspac-yesG</i> (Em <sup>r</sup> )                                                                                                                                                          | This study          |
| OAM1002 | <i>trpC2 Pspac-ycsI</i> (Em <sup>r</sup> )                                                                                                                                                          | This study          |
| OAM888  | <i>trpC2 PywIE-lacZ</i> (Tc <sup>r</sup> )                                                                                                                                                          | 7                   |
| OAM1003 | <i>trpC2 PywIE-lacZ</i> (Tc <sup>r</sup> ) <i>mntA</i> (Km <sup>r</sup> ) <i>mntH</i> (Em <sup>r</sup> , <i>lacZ</i> ::Tc <sup>r</sup> )                                                            | This study          |
| OAM1004 | <i>trpC2 PywIE-lacZ</i> (Tc <sup>r</sup> ) <i>mneP</i> (Em <sup>r</sup> , <i>lacZ</i> ::Tc <sup>r</sup> )                                                                                           | This study          |
| OAM1006 | <i>trpC2 PywIE-lacZ</i> (Tc <sup>r</sup> ) <i>ahrC</i> (Cm <sup>r</sup> ::Km <sup>r</sup> )                                                                                                         | This study          |
| OAM1007 | <i>trpC2 PywIE-lacZ</i> (Tc <sup>r</sup> ) <i>mntR</i> (Em <sup>r</sup> )                                                                                                                           | This study          |
| OAM1008 | <i>trpC2 PywIE-lacZ</i> (Tc <sup>r</sup> ) <i>ywlD</i> (Km <sup>r</sup> )                                                                                                                           | This study          |
| OAM1009 | <i>trpC2 PywIE-lacZ</i> (Tc <sup>r</sup> ) Pspac- <i>mntH</i> (Em <sup>r</sup> )                                                                                                                    | This study          |
| OAM1010 | <i>trpC2 PywIE-lacZ</i> (Tc <sup>r</sup> ) Pspac- <i>yesG</i> (Em <sup>r</sup> )                                                                                                                    | This study          |
| OAM1011 | <i>trpC2 PywIE-lacZ</i> (Tc <sup>r</sup> ) <i>yknV</i> (Km <sup>r</sup> )                                                                                                                           | This study          |
| OAM1012 | <i>trpC2 PywIE-lacZ</i> (Tc <sup>r</sup> ) <i>yknV</i> (Km <sup>r</sup> ) <i>amyE</i> ::PxyI- <i>yknV</i> , <i>xyIR</i> (Cm <sup>r</sup> )                                                          | This study          |
| OAM1013 | <i>trpC2 amyE</i> ::PywIDE- <i>lacZ</i> (Cm <sup>r</sup> )                                                                                                                                          | This study          |
| OAM1082 | <i>trpC2 amyE</i> ::[PywIDE+PywIE]- <i>lacZ</i> (Cm <sup>r</sup> )                                                                                                                                  | This study          |
| OAM1014 | <i>trpC2 PmntA</i> ::pMut-PmntA(Em <sup>r</sup> )                                                                                                                                                   | This study          |
| OAM1015 | <i>trpC2 PmntH</i> ::pMut-PmntH(Em <sup>r</sup> )                                                                                                                                                   | This study          |
| OAM1016 | <i>trpC2 PmneP</i> ::pMut-PmneP(Em <sup>r</sup> )                                                                                                                                                   | This study          |
| OAM1017 | <i>trpC2 PmneS</i> ::pMut-PmneS(Em <sup>r</sup> )                                                                                                                                                   | This study          |
| OAM1018 | <i>trpC2 PmntA</i> ::pMut-PmntA(Em <sup>r</sup> ) <i>ahrC</i> (Cm <sup>r</sup> ::Km <sup>r</sup> )                                                                                                  | This study          |
| OAM1019 | <i>trpC2 PmntH</i> ::pMut-PmntH(Em <sup>r</sup> ) <i>ahrC</i> (Cm <sup>r</sup> ::Km <sup>r</sup> )                                                                                                  | This study          |
| OAM1020 | <i>trpC2 PmneP</i> ::pMut-PmneP(Em <sup>r</sup> ) <i>ahrC</i> (Cm <sup>r</sup> ::Km <sup>r</sup> )                                                                                                  | This study          |
| OAM1021 | <i>trpC2 PmneS</i> ::pMut-PmneS(Em <sup>r</sup> ) <i>ahrC</i> (Cm <sup>r</sup> ::Km <sup>r</sup> )                                                                                                  | This study          |
| OAM1022 | <i>trpC2 PmntH</i> ::pMut-PmntH(Em <sup>r</sup> ::Tc <sup>r</sup> ) <i>mntR</i> (Em <sup>r</sup> )                                                                                                  | This study          |
| OAM1023 | <i>trpC2 PmntH</i> ::pMut-PmntH(Em <sup>r</sup> ::Tc <sup>r</sup> ) <i>ahrC</i> (Cm <sup>r</sup> ::Km <sup>r</sup> ) <i>mntR</i> (Em <sup>r</sup> )                                                 | This study          |
| OAM1024 | <i>trpC2 PmntA</i> ::pMut-pmntA(Em <sup>r</sup> ) <i>ccpN</i> (Em <sup>r</sup> , <i>lacZ</i> ::Tc <sup>r</sup> )                                                                                    | This study          |
| OAM1025 | <i>trpC2 PyknU</i> ::pMut-PyknU(Em <sup>r</sup> )                                                                                                                                                   | This study          |
| OAM1026 | <i>trpC2 PyknU</i> ::pMut-PyknU(Em <sup>r</sup> ) <i>ahrC</i> (Cm <sup>r</sup> ::Km <sup>r</sup> )                                                                                                  | This study          |
| OAM1027 | <i>trpC2 amyE</i> ::PycsF- <i>lacZ</i> (Cm <sup>r</sup> ) (-307/+127 <sup>1</sup> )                                                                                                                 | This study          |
| OAM1028 | <i>trpC2 amyE</i> ::PycsF- <i>lacZ</i> (Cm <sup>r</sup> ) (-307/+127 <sup>1</sup> ) <i>ahrC</i> (Cm <sup>r</sup> ::Km <sup>r</sup> )                                                                | This study          |
| OAM1029 | <i>trpC2 amyE</i> ::PycsF- <i>lacZ</i> (Cm <sup>r</sup> ) (-307/+127 <sup>1</sup> ) <i>mntR</i> (Em <sup>r</sup> )                                                                                  | This study          |
| OAM1030 | <i>trpC2 amyE</i> ::PycsF- <i>lacZ</i> (Cm <sup>r</sup> ) (-307/+127 <sup>1</sup> ) <i>ahrC</i> (Cm <sup>r</sup> ::Km <sup>r</sup> ) <i>mntR</i> (Em <sup>r</sup> )                                 | This study          |
| OAM1089 | <i>trpC2 amyE</i> ::PycsF- <i>lacZ</i> (Cm <sup>r</sup> ) (-307/+127 <sup>1</sup> ) <i>mra</i> (Cm <sup>r</sup> ::Km <sup>r</sup> )                                                                 | This study          |
| OAM1090 | <i>trpC2 amyE</i> ::PycsF- <i>lacZ</i> (Cm <sup>r</sup> ) (-307/+127 <sup>1</sup> ) <i>kipR</i> (Km <sup>r</sup> )                                                                                  | This study          |
| OAM1121 | <i>trpC2 amyE</i> ::PycsF- <i>lacZ</i> (Cm <sup>r</sup> ::Tc <sup>r</sup> ) (-307/+127 <sup>1</sup> ) <i>kipR</i> (Km <sup>r</sup> ) <i>mntR</i> (Em <sup>r</sup> )                                 | This study          |
| OAM1122 | <i>trpC2 amyE</i> ::PycsF- <i>lacZ</i> (Cm <sup>r</sup> ::Tc <sup>r</sup> ) (-307/+127 <sup>1</sup> ) <i>ahrC</i> (Cm <sup>r</sup> ::Km <sup>r</sup> )                                              | This study          |
| OAM1123 | <i>trpC2 amyE</i> ::PycsF- <i>lacZ</i> (Cm <sup>r</sup> ::Tc <sup>r</sup> ) (-307/+127 <sup>1</sup> ) <i>ahrC</i> (Cm <sup>r</sup> ::Km <sup>r</sup> ) <i>mra</i> (Cm <sup>r</sup> )                | This study          |
| OAM1091 | <i>trpC2 amyE</i> ::PycsF- <i>lacZ</i> (Cm <sup>r</sup> ) (-307/+19 <sup>1</sup> )                                                                                                                  | This study          |
| OAM1092 | <i>trpC2 amyE</i> ::PycsF- <i>lacZ</i> (Cm <sup>r</sup> ) (-307/+19 <sup>1</sup> ) <i>ahrC</i> (Cm <sup>r</sup> ::Km <sup>r</sup> )                                                                 | This study          |
| OAM1093 | <i>trpC2 amyE</i> ::PycsF- <i>lacZ</i> (Cm <sup>r</sup> ) (-307/+19 <sup>1</sup> ) <i>mntR</i> (Em <sup>r</sup> )                                                                                   | This study          |
| OAM1094 | <i>trpC2 amyE</i> ::PycsF- <i>lacZ</i> (Cm <sup>r</sup> ) (-307/+19 <sup>1</sup> ) <i>kipR</i> (Km <sup>r</sup> )                                                                                   | This study          |
| OAM1095 | <i>trpC2 amyE</i> ::PycsF- <i>lacZ</i> (Cm <sup>r</sup> ) (-202/+19 <sup>1</sup> )                                                                                                                  | This study          |
| OAM1096 | <i>trpC2 amyE</i> ::PycsF- <i>lacZ</i> (Cm <sup>r</sup> ) (-202/+19 <sup>1</sup> ) <i>ahrC</i> (Cm <sup>r</sup> ::Km <sup>r</sup> )                                                                 | This study          |
| OAM1097 | <i>trpC2 amyE</i> ::PycsF- <i>lacZ</i> (Cm <sup>r</sup> ) (-202/+19 <sup>1</sup> ) <i>mntR</i> (Em <sup>r</sup> )                                                                                   | This study          |
| OAM1098 | <i>trpC2 amyE</i> ::PycsF- <i>lacZ</i> (Cm <sup>r</sup> ) (-112/+19 <sup>1</sup> )                                                                                                                  | This study          |
| OAM1099 | <i>trpC2 amyE</i> ::PycsF- <i>lacZ</i> (Cm <sup>r</sup> ) (-112/+19 <sup>1</sup> ) <i>ahrC</i> (Cm <sup>r</sup> ::Km <sup>r</sup> )                                                                 | This study          |
| OAM1100 | <i>trpC2 amyE</i> ::PycsF- <i>lacZ</i> (Cm <sup>r</sup> ) (-112/+19 <sup>1</sup> ) <i>mntR</i> (Em <sup>r</sup> )                                                                                   | This study          |
| OAM1101 | <i>trpC2 amyE</i> ::PycsF- <i>lacZ</i> (Cm <sup>r</sup> ) (-88/+19 <sup>1</sup> )                                                                                                                   | This study          |
| OAM1102 | <i>trpC2 amyE</i> ::PycsF- <i>lacZ</i> (Cm <sup>r</sup> ) (-88/+19 <sup>1</sup> ) <i>ahrC</i> (Cm <sup>r</sup> ::Km <sup>r</sup> )                                                                  | This study          |

|         |                                                                                                                                                                            |                                                |
|---------|----------------------------------------------------------------------------------------------------------------------------------------------------------------------------|------------------------------------------------|
| OAM1103 | <i>trpC2 amyE::PycsF-lacZ</i> (Cm <sup>r</sup> ) (-88/+19 <sup>1</sup> ) <i>mntR</i> (Em <sup>r</sup> )                                                                    | This study                                     |
| OAM1104 | <i>trpC2 amyE::PycsF-lacZ</i> (Cm <sup>r</sup> ) (-70/+19 <sup>1</sup> )                                                                                                   | This study                                     |
| OAM1105 | <i>trpC2 amyE::PycsF-lacZ</i> (Cm <sup>r</sup> ) (-70/+19 <sup>1</sup> ) <i>ahrC</i> (Cm <sup>r</sup> ::Km <sup>r</sup> )                                                  | This study                                     |
| OAM1106 | <i>trpC2 amyE::PycsF-lacZ</i> (Cm <sup>r</sup> ) (-70/+19 <sup>1</sup> ) <i>mntR</i> (Em <sup>r</sup> )                                                                    | This study                                     |
| OAM1119 | <i>trpC2 amyE::PycsF-lacZ</i> (Cm <sup>r</sup> ::Tc <sup>r</sup> ) (-70/+19 <sup>1</sup> ) <i>ahrC</i> (Cm <sup>r</sup> ::Km <sup>r</sup> )                                | This study                                     |
| OAM1120 | <i>trpC2 amyE::PycsF-lacZ</i> (Cm <sup>r</sup> ::Tc <sup>r</sup> ) (-70/+19 <sup>1</sup> ) <i>ahrC</i> (Cm <sup>r</sup> ::Km <sup>r</sup> ) <i>mntR</i> (Em <sup>r</sup> ) | This study                                     |
| OAM1107 | <i>trpC2 amyE::PycsF-lacZ</i> (Cm <sup>r</sup> ) (-70/+127 <sup>1</sup> )                                                                                                  | This study                                     |
| OAM1108 | <i>trpC2 amyE::PycsF-lacZ</i> (Cm <sup>r</sup> ) (-70/+127 <sup>1</sup> ) <i>ahrC</i> (Cm <sup>r</sup> ::Km <sup>r</sup> )                                                 | This study                                     |
| OAM1109 | <i>trpC2 amyE::PycsF-lacZ</i> (Cm <sup>r</sup> ) (-70/+127 <sup>1</sup> ) <i>mntR</i> (Em <sup>r</sup> )                                                                   | This study                                     |
| OAM1110 | <i>trpC2 amyE::PycsF-lacZ</i> (Cm <sup>r</sup> ) (-49/+127 <sup>1</sup> )                                                                                                  | This study                                     |
| OAM1111 | <i>trpC2 amyE::PycsF-lacZ</i> (Cm <sup>r</sup> ) (-49/+127 <sup>1</sup> ) <i>ahrC</i> (Cm <sup>r</sup> ::Km <sup>r</sup> )                                                 | This study                                     |
| OAM1112 | <i>trpC2 amyE::PycsF-lacZ</i> (Cm <sup>r</sup> ) (-49/+127 <sup>1</sup> ) <i>mntR</i> (Em <sup>r</sup> )                                                                   | This study                                     |
| YCSFd   | <i>trpC2 PycsF-lacZ</i> (Em <sup>r</sup> )                                                                                                                                 | 66                                             |
| OAM1031 | <i>trpC2 PycsF-lacZ</i> (Em <sup>r</sup> ) <i>ccpA</i> (Cm <sup>r</sup> )                                                                                                  | This study                                     |
| OAM1113 | <i>trpC2 amyE::PmntH-lacZ</i> (Cm <sup>r</sup> ) (-245/+67 <sup>1</sup> )                                                                                                  | This study                                     |
| OAM1114 | <i>trpC2 amyE::PmntH-lacZ</i> (Cm <sup>r</sup> ) (-245/+67 <sup>1</sup> ) <i>mntR</i> (Em <sup>r</sup> )                                                                   | This study                                     |
| OAM1115 | <i>trpC2 amyE::PmntH-lacZ</i> (Cm <sup>r</sup> ) (-245/+30 <sup>1</sup> )                                                                                                  | This study                                     |
| OAM1116 | <i>trpC2 amyE::PmntH-lacZ</i> (Cm <sup>r</sup> ) (-245/+30 <sup>1</sup> ) <i>mntR</i> (Em <sup>r</sup> )                                                                   | This study                                     |
| OAM1117 | <i>trpC2 amyE::PmntH-lacZ</i> (Cm <sup>r</sup> ) (-245/+6 <sup>1</sup> )                                                                                                   | This study                                     |
| OAM1118 | <i>trpC2 amyE::PmntH-lacZ</i> (Cm <sup>r</sup> ) (-245/+6 <sup>1</sup> ) <i>mntR</i> (Em <sup>r</sup> )                                                                    | This study                                     |
| YUAAAd  | <i>trpC2 PktrA-lacZ</i> (Em <sup>r</sup> )                                                                                                                                 | 66                                             |
| OAM1078 | <i>trpC2 PktrA-lacZ</i> (Em <sup>r</sup> ) <i>ahrC</i> (Km <sup>r</sup> )                                                                                                  | This study                                     |
| OAM825  | <i>trpC2 amyE::PpyrR-lacZ</i> (Cm <sup>r</sup> )                                                                                                                           | 4                                              |
| OAM1036 | <i>trpC2 amyE::PpyrR-lacZ</i> (Cm <sup>r</sup> ) <i>mntR</i> (Em <sup>r</sup> )                                                                                            | This study                                     |
| OAM1037 | <i>trpC2 amyE::PargC-lacZ</i> (Cm <sup>r</sup> )                                                                                                                           | This study                                     |
| OAM1038 | <i>trpC2 amyE::PargC-lacZ</i> (Cm <sup>r</sup> ) <i>mntR</i> (Em <sup>r</sup> )                                                                                            | This study                                     |
| OAM1039 | <i>trpC2 amyE::PargG-lacZ</i> (Cm <sup>r</sup> )                                                                                                                           | This study                                     |
| OAM1040 | <i>trpC2 amyE::PargG-lacZ</i> (Cm <sup>r</sup> ) <i>mntR</i> (Em <sup>r</sup> )                                                                                            | This study                                     |
| OAM1073 | <i>trpC2 amyE::PczcD-lacZ</i> (Cm <sup>r</sup> )                                                                                                                           | This study                                     |
| OAM1074 | <i>trpC2 amyE::PczcD-lacZ</i> (Cm <sup>r</sup> ) <i>mntR</i> (Em <sup>r</sup> )                                                                                            | This study                                     |
| OAM1075 | <i>trpC2 amyE::PmgtE-lacZ</i> (Cm <sup>r</sup> )                                                                                                                           | This study                                     |
| OAM1076 | <i>trpC2 amyE::PmgtE-lacZ</i> (Cm <sup>r</sup> ) <i>mntR</i> (Em <sup>r</sup> )                                                                                            | This study                                     |
| OAM1045 | <i>trpC2 PpucR-lacZ</i> (Em <sup>r</sup> ::Tc <sup>r</sup> )                                                                                                               | Derivative of BSF2277 (66)                     |
| OAM1046 | <i>trpC2 PpucR-lacZ</i> (Em <sup>r</sup> ::Tc <sup>r</sup> ) <i>ahrC</i> (Km <sup>r</sup> )                                                                                | This study                                     |
| OAM1047 | <i>trpC2 PpucR-lacZ</i> (Em <sup>r</sup> ::Tc <sup>r</sup> ) <i>mntR</i> (Em <sup>r</sup> )                                                                                | This study                                     |
| OAM1048 | <i>trpC2 PpucA-lacZ</i> (Em <sup>r</sup> ::Tc <sup>r</sup> )                                                                                                               | Derivative of BSF2309 (66)                     |
| OAM1049 | <i>trpC2 PpucA-lacZ</i> (Em <sup>r</sup> ::Tc <sup>r</sup> ) <i>ahrC</i> (Km <sup>r</sup> )                                                                                | This study                                     |
| OAM1050 | <i>trpC2 PpucA-lacZ</i> (Em <sup>r</sup> ::Tc <sup>r</sup> ) <i>mntR</i> (Em <sup>r</sup> )                                                                                | This study                                     |
| OAM1051 | <i>trpC2 PpucG-lacZ</i> (Em <sup>r</sup> ::Tc <sup>r</sup> )                                                                                                               | Derivative of BSF2285 (66)                     |
| OAM1052 | <i>trpC2 PpucG-lacZ</i> (Em <sup>r</sup> ::Tc <sup>r</sup> ) <i>ahrC</i> (Km <sup>r</sup> )                                                                                | This study                                     |
| OAM1053 | <i>trpC2 PpucG-lacZ</i> (Em <sup>r</sup> ::Tc <sup>r</sup> ) <i>mntR</i> (Em <sup>r</sup> )                                                                                | This study                                     |
| OAM914  | <i>trpC2 amyE::PfrIB-lacZ</i> (Cm <sup>r</sup> )                                                                                                                           | 13                                             |
| OAM1063 | <i>trpC2 amyE::PfrIB-lacZ</i> (Cm <sup>r</sup> ) <i>ahrC</i> (Em <sup>r</sup> )                                                                                            | This study                                     |
| OAM1064 | <i>trpC2 amyE::PfrIB-lacZ</i> (Cm <sup>r</sup> ) <i>mntR</i> (Km <sup>r</sup> )                                                                                            | This study                                     |
| OAM1060 | <i>trpC2 PartP-lacZ</i> (Em <sup>r</sup> ::Tc <sup>r</sup> )                                                                                                               | Derivative of YQIXd (66)                       |
| OAM1061 | <i>trpC2 PartP-lacZ</i> (Em <sup>r</sup> ::Tc <sup>r</sup> ) <i>ahrC</i> (Km <sup>r</sup> )                                                                                | This study                                     |
| OAM1062 | <i>trpC2 PartP-lacZ</i> (Em <sup>r</sup> ::Tc <sup>r</sup> ) <i>mntR</i> (Em <sup>r</sup> )                                                                                | This study                                     |
| OAM1054 | <i>trpC2 amyE::PspoIIE-lacZ</i> (Cm <sup>r</sup> )                                                                                                                         | Constructed by Sato T                          |
| OAM1055 | <i>trpC2 amyE::PspoIIE-lacZ</i> (Cm <sup>r</sup> ) <i>ahrC</i> (Km <sup>r</sup> )                                                                                          | This study                                     |
| OAM1056 | <i>trpC2 amyE::PspoIIE-lacZ</i> (Cm <sup>r</sup> ) <i>mntR</i> (Em <sup>r</sup> )                                                                                          | This study                                     |
| OAM1057 | <i>trpC2 PspolIAA-lacZ</i> (Em <sup>r</sup> ::Tc <sup>r</sup> )                                                                                                            | Derivative of the strain constructed by Sato T |
| OAM1058 | <i>trpC2 PspolIAA-lacZ</i> (Em <sup>r</sup> ::Tc <sup>r</sup> ) <i>ahrC</i> (Km <sup>r</sup> )                                                                             | This study                                     |
| OAM1059 | <i>trpC2 PspolIAA-lacZ</i> (Em <sup>r</sup> ::Tc <sup>r</sup> ) <i>mntR</i> (Em <sup>r</sup> )                                                                             | This study                                     |
| OAM1043 | <i>trpC2 PskfA-lacZ</i> (Em <sup>r</sup> ::Tc <sup>r</sup> )                                                                                                               | Derivative of YBCOd (66)                       |
| OAM1087 | <i>trpC2 PskfA-lacZ</i> (Em <sup>r</sup> ::Tc <sup>r</sup> ) <i>ahrC</i> (Km <sup>r</sup> )                                                                                | This study                                     |
| OAM1044 | <i>trpC2 PskfA-lacZ</i> (Em <sup>r</sup> ::Tc <sup>r</sup> ) <i>mntR</i> (Em <sup>r</sup> )                                                                                | This study                                     |
| OAM1079 | <i>trpC2 PkimA-lacZ</i> (Em <sup>r</sup> ::Tc <sup>r</sup> )                                                                                                               | Derivative of YDAOd (66)                       |
| OAM1080 | <i>trpC2 PkimA-lacZ</i> (Em <sup>r</sup> ::Tc <sup>r</sup> ) <i>ahrC</i> (Km <sup>r</sup> )                                                                                | This study                                     |
| OAM1081 | <i>trpC2 PkimA-lacZ</i> (Em <sup>r</sup> ::Tc <sup>r</sup> ) <i>mntR</i> (Em <sup>r</sup> )                                                                                | This study                                     |
| OAM1083 | <i>trpC2 amyE::Phom-lacZ</i> (Cm <sup>r</sup> )                                                                                                                            | This study                                     |
| OAM1084 | <i>trpC2 amyE::Phom-lacZ</i> (Cm <sup>r</sup> ) <i>ahrC</i> (Km <sup>r</sup> )                                                                                             | This study                                     |
| OAM1085 | <i>trpC2 amyE::Phom-lacZ</i> (Cm <sup>r</sup> ) <i>mntR</i> (Em <sup>r</sup> )                                                                                             | This study                                     |
| OAM1041 | <i>trpC2 amyE::PdhbA-lacZ</i> (Cm <sup>r</sup> )                                                                                                                           | This study                                     |
| OAM1086 | <i>trpC2 amyE::PdhbA-lacZ</i> (Cm <sup>r</sup> ) <i>ahrC</i> (Km <sup>r</sup> )                                                                                            | This study                                     |
| OAM1042 | <i>trpC2 amyE::PdhbA-lacZ</i> (Cm <sup>r</sup> ) <i>mntR</i> (Em <sup>r</sup> )                                                                                            | This study                                     |
| OAM1065 | <i>trpC2 amyE::PfeuA-lacZ</i> (Cm <sup>r</sup> )                                                                                                                           | This study                                     |
| OAM1066 | <i>trpC2 amyE::PfeuA-lacZ</i> (Cm <sup>r</sup> ) <i>ahrC</i> (Em <sup>r</sup> )                                                                                            | This study                                     |
| OAM1067 | <i>trpC2 amyE::PfeuA-lacZ</i> (Cm <sup>r</sup> ) <i>mntR</i> (Km <sup>r</sup> )                                                                                            | This study                                     |
| OAM838  | <i>trpC2 amyE::PhisZ-lacZ</i> (Cm <sup>r</sup> )                                                                                                                           | 4                                              |
| OAM1068 | <i>trpC2 amyE::PhisZ-lacZ</i> (Cm <sup>r</sup> ) <i>ahrC</i> (Em <sup>r</sup> )                                                                                            | This study                                     |

| OAM1069          | <i>trpC2 amyE::PhisZ-lacZ (Cm<sup>r</sup>) mntR (Km<sup>r</sup>)</i>               | This study                |
|------------------|------------------------------------------------------------------------------------|---------------------------|
| OAM1070          | <i>trpC2 PpftA-lacZ (Em<sup>r</sup>::Tc<sup>r</sup>)</i>                           | Derivative of OAM950 (35) |
| OAM1071          | <i>trpC2 PpftA-lacZ (Em<sup>r</sup>::Tc<sup>r</sup>) ahrC (Km<sup>r</sup>)</i>     | This study                |
| OAM1072          | <i>trpC2 PpftA-lacZ (Em<sup>r</sup>::Tc<sup>r</sup>) mntR (Em<sup>r</sup>)</i>     | This study                |
| Plasmid          | Description                                                                        | Reference or source       |
| pUKM504          | pUC19 bearing Km <sup>r</sup>                                                      | 56                        |
| pUKM504-ywID     | pUKM504 carrying a part of <i>ywID</i>                                             | This study                |
| pUKM504-yknV     | pUKM504 carrying a part of <i>yknV</i>                                             | This study                |
| pUKM504-mntA     | pUKM504 carrying a part of <i>mntA</i>                                             | This study                |
| pUKM504-mneS     | pUKM504 carrying a part of <i>mneS</i>                                             | This study                |
| pUKM504-kipR     | pUKM504 carrying a part of <i>kipR</i>                                             | This study                |
| pIS284           | Amp <sup>r</sup> <i>amyE::lacZ</i> Cm <sup>r</sup>                                 | 65, I Smith               |
| pIS284-ywID      | Amp <sup>r</sup> <i>amyE::PpywDE-lacZ</i> Cm <sup>r</sup>                          | This study                |
| pIS284-[ywIDE+E] | Amp <sup>r</sup> <i>amyE::[PpywDE+PpywIE]-lacZ</i> Cm <sup>r</sup>                 | This study                |
| pIS284-ycsF-Wt   | Amp <sup>r</sup> <i>amyE::PycsF-lacZ</i> Cm <sup>r</sup> (-307/+127 <sup>1</sup> ) | This study                |
| pIS284-ycsF-del1 | Amp <sup>r</sup> <i>amyE::PycsF-lacZ</i> Cm <sup>r</sup> (-307/+19 <sup>1</sup> )  | This study                |
| pIS284-ycsF-del2 | Amp <sup>r</sup> <i>amyE::PycsF-lacZ</i> Cm <sup>r</sup> (-202/+19 <sup>1</sup> )  | This study                |
| pIS284-ycsF-del3 | Amp <sup>r</sup> <i>amyE::PycsF-lacZ</i> Cm <sup>r</sup> (-112/+19 <sup>1</sup> )  | This study                |
| pIS284-ycsF-del4 | Amp <sup>r</sup> <i>amyE::PycsF-lacZ</i> Cm <sup>r</sup> (-88/+19 <sup>1</sup> )   | This study                |
| pIS284-ycsF-del5 | Amp <sup>r</sup> <i>amyE::PycsF-lacZ</i> Cm <sup>r</sup> (-70/+19 <sup>1</sup> )   | This study                |
| pIS284-ycsF-del6 | Amp <sup>r</sup> <i>amyE::PycsF-lacZ</i> Cm <sup>r</sup> (-70/+127 <sup>1</sup> )  | This study                |
| pIS284-ycsF-del7 | Amp <sup>r</sup> <i>amyE::PycsF-lacZ</i> Cm <sup>r</sup> (-49/+127 <sup>1</sup> )  | This study                |
| pIS284-mntH-Wt   | Amp <sup>r</sup> <i>amyE::PmntH-lacZ</i> Cm <sup>r</sup> (-245/+67 <sup>1</sup> )  | This study                |
| pIS284-mntH-del1 | Amp <sup>r</sup> <i>amyE::PmntH-lacZ</i> Cm <sup>r</sup> (-245/+30 <sup>1</sup> )  | This study                |
| pIS284-mntH-del2 | Amp <sup>r</sup> <i>amyE::PmntH-lacZ</i> Cm <sup>r</sup> (-245/+6 <sup>1</sup> )   | This study                |
| pIS284-pyrR      | Amp <sup>r</sup> <i>amyE::PpyrR-lacZ</i> Cm <sup>r</sup>                           | This study                |
| pIS284-argG      | Amp <sup>r</sup> <i>amyE::PargG-lacZ</i> Cm <sup>r</sup>                           | This study                |
| pIS284-argC      | Amp <sup>r</sup> <i>amyE::PargC-lacZ</i> Cm <sup>r</sup>                           | This study                |
| pIS284-czcD      | Amp <sup>r</sup> <i>amyE::PczcD-lacZ</i> Cm <sup>r</sup>                           | This study                |
| pIS284-mgtE      | Amp <sup>r</sup> <i>amyE::PmgtE-lacZ</i> Cm <sup>r</sup>                           | This study                |
| pIS284-hom       | Amp <sup>r</sup> <i>amyE::Phom-lacZ</i> Cm <sup>r</sup>                            | This study                |
| pIS284-dhbA      | Amp <sup>r</sup> <i>amyE::PdhbA-lacZ</i> Cm <sup>r</sup>                           | This study                |
| pIS284-feuA      | Amp <sup>r</sup> <i>amyE::PfeuA-lacZ</i> Cm <sup>r</sup>                           | This study                |
| pMutinIII        | Insertion vector, Amp <sup>r</sup> , Em <sup>r</sup> , <i>lacZI</i>                | 37                        |
| pMutin-PmntA     | pMutinIII carrying <i>PmntA</i>                                                    | This study                |
| pMutin-PmntH     | pMutinIII carrying <i>PmntH</i>                                                    | This study                |
| pMutin-PmneP     | pMutinIII carrying <i>PmneP</i>                                                    | This study                |
| pMutin-PmneS     | pMutinIII carrying <i>PmneS</i>                                                    | This study                |
| pMutin-PyknU     | pMutinIII carrying <i>PyknU</i>                                                    | This study                |
| pMUTIN-His       | Amp <sup>r</sup> Em <sup>r</sup> His-tag Pspac                                     | 63                        |
| pMUTIN-His-mntH  | Amp <sup>r</sup> Em <sup>r</sup> C-terminal region of <i>mntH</i> His-tag Pspac    | This study                |
| pMUTIN-His-ycsF  | Amp <sup>r</sup> Em <sup>r</sup> C-terminal region of <i>ycsF</i> His-tag Pspac    | This study                |
| pMUTIN-His-ycsG  | Amp <sup>r</sup> Em <sup>r</sup> C-terminal region of <i>ycsG</i> His-tag Pspac    | This study                |
| pX               | Amp <sup>r</sup> <i>amyE::xylR-Pxyl</i> Cm <sup>r</sup>                            | 40                        |
| pX-yknV          | Amp <sup>r</sup> <i>amyE::xylR-Pxyl-yknU</i> Cm <sup>r</sup>                       | This study                |
| pX-ycsG          | Amp <sup>r</sup> <i>amyE::xylR-Pxyl-ycsG</i> Cm <sup>r</sup>                       | This study                |
| pLacZ::Tc        | Amp <sup>r</sup> <i>lacZ::Tc<sup>r</sup></i>                                       | 62                        |
| pCm::Km          | Amp <sup>r</sup> Cm <sup>r</sup> ::Km <sup>r</sup>                                 | 67                        |
| pCm::Tc          | Amp <sup>r</sup> Cm <sup>r</sup> ::Tc <sup>r</sup>                                 | 67                        |
| pEm::Tc          | Amp <sup>r</sup> Em <sup>r</sup> ::Tc <sup>r</sup>                                 | 67                        |
| pGEX-4T1         | Amp <sup>r</sup> GST                                                               | Qiagen                    |
| pGEX-4T1-mntR    | pGEX4T-1 carrying <i>mntR</i>                                                      | This study                |
| pGEX-4T1-ahrC    | pGEX4T-1 carrying <i>ahrC</i>                                                      | This study                |

\* Relative to the transcription start site

Table S3. Oligonucleotides used for this study.

| Name               | Sequence (5'-3')                    | Use/products                                              |
|--------------------|-------------------------------------|-----------------------------------------------------------|
| pUKM-ywID-F-B      | AAAGGATCCCTTGGAAATGGGCATGGT         | pUKM504-ywID                                              |
| pUKM-ywID-R-H      | ATGAAGCTTGTTCCTCCGACCAGCAGG         | pUKM504-ywID                                              |
| pUKM-yknV-F-B      | AAGGATCCAATGTGTTAAGAATCAGGTG        | pUKM504-yknV                                              |
| pUKM-yknV-R-Sa     | TCAGTTCGACAGCCGTCCTCAATCGC          | pUKM504-yknV                                              |
| pUKM-ytgA-F-B      | AAAGGATCCGCACCTTTACAAAAGC           | pUKM504-mntA                                              |
| pUKM-ytgA-R-Sa     | TCAGTTCGACTCATCCCAAAGTACGCA         | pUKM504-mntA                                              |
| pUKM-ydxT-F-B      | AAAGGATCCGTGACGAAGATCATCCATA        | pUKM504-mneS                                              |
| pUKM-ydxT-R-H      | ATGAAGCTT TATGTGCAATCCATCTGTC       | pUKM504-mneS                                              |
| pUKM-kipR-F-B      | AAAGGATCCTAACCTTAAGTGAAGCTGGT       | pUKM504-kipR                                              |
| pUKM-kipR-R-Sa     | TCAGTTCGACTCGGTTTGTGTTGATGTATGC     | pUKM504-kipR                                              |
| pIS-Pywid-F(E)     | TCAGAATTCGCCGACAGCGCCTCTTG          | pIS284-ywID, pIS284-[ywID+E]                              |
| pIS-Pywid-R(B)     | TCAGGATCCACATAAAATAACCCCTTGGACAC    | pIS284-ywID                                               |
| pMut-Pywid-F(B)    | AGGGATCCGTCAGTACCCCTTATTTTTCTC      | pIS284-[ywID+E]                                           |
| pIS-yesF-E         | ATCGAATTCGGCTTACAATGGAGAATG         | EMSA, pIS284-yesF-Wt, -del1                               |
| pIS-yesF-H-bio     | biotin-CCGAAGCTTTCTCCTAAATC         | EMSA, pIS284-yesF-Wt, del6, del7, EMSA (del2, del3, del7) |
| pIS-yesF-H2        | CGGAAGCTTCCGAATTTTGAAGCTTTATTTCA    | pIS284-yesF-del1, del2, del3, del4, del5, EMSA (del5)     |
| pIS-yesF-E2        | ATCGAATTCATCGTAAAAGAAACGGCTG        | pIS284-yesF-del2                                          |
| pIS-yesF-E3        | ATCGAATTCAGAGTCTTAAGATGGACTC        | pIS284-yesF-del3, EMSA (del2)                             |
| pIS-yesF-E3aa      | ATCGAATTCCTTAAAGTTTGGCAGGTTTATTCT   | pIS284-yesF-del4, EMSA (del3)                             |
| pIS-yesF-E3a       | ATCGAATTCCTGGGACCATTGGTAGG          | pIS284-yesF-del5, del6, EMSA (del6)                       |
| pIS-yesF-E3b       | ATCGAATTCGACAAAAGTATTTACAAAAGT      | pIS284-yesF-del7                                          |
| pIS-ydaR-B         | ATCGGATCCCGGCCATCATCGGGG            | pIS284-mntH-Wt                                            |
| pIS-ydaR-H         | ATGAAGCTTGTCTCACCTGAATCTGTTT        | pIS284-mntH-Wt, EMSA                                      |
| pIS-mntH-H3        | ATGAAGCTTCAAAGAGTTTCTTAAAGCA        | pIS284-mntH-del1, EMSA                                    |
| pIS-mntH-H2        | ATGAAGCTTTTATCTACATCATATGACCATCC    | pIS284-mntH-del2, EMSA                                    |
| pIS-ytgA-E         | ATCGAATTCACACAGCATGGTTAAGAAA        | pMutin-pmntA                                              |
| pIS-ytgA-B         | ATGGGATCCATTTCTCCTCTTTGGCCATC       | pMutin-pmntA, EMSA                                        |
| pMut-ydaR-H        | ATCAAGCTTCGGCTCTATGATTTGCCG         | pMutin-pmntH                                              |
| pMut-ydaR-B        | ATCGGATCCGTGTCATCATGTCAC            | pMutin-pmntH                                              |
| pMut-ydfM-E        | CTCGAATTCGAGATATTATGTTA             | pMutin-pmneP, EMSA                                        |
| pMut-ydfM-B        | ATGGGATCCCTATAAAAGTGCACAAAAAAA      | pMutin-pmneP, EMSA                                        |
| pMut-ydxt-E        | CTCGAATTCGGAATTACACGGCAATC          | pMutin-pmneS                                              |
| pMut-ydxt-B        | ATGGGATCCAAAACCTCTCTCGCTCA          | pMutin-pmneS                                              |
| pIS-yknU-E         | ATCGAATTCGTGAATCTATGATACGGCTATG     | pMutin-pyknU                                              |
| pMut-PyknU-B       | CCGGGATCCATCCAGCACCTTTCCAAC         | pMutin-pyknU                                              |
| pMut-His-ydaR-H    | TGAAAGCTTGGATTGGGCACGGA             | pMUTIN-His-mntH                                           |
| pMut-His-ydaR-E    | GTCTCACCTGAATTTCTGTTT               | pMUTIN-His-mntH                                           |
| PMut-His-yesF-F-E  | CGCGAATTTTTCGGTCTTGGCTGAGA          | pMUTIN-His-yesF                                           |
| PMut-His-yesF-R-Xh | GCGCTCGAGTTATGTTGACCTCTGTTCTGA      | pMUTIN-His-yesF                                           |
| PMut-His-yesG-F-H  | CGCAAGCTTGGGTTCTAGGCGTTG            | pMUTIN-His-yesG                                           |
| PMut-His-yesG-R-Xh | GCGCTCGAGTTCAGCTCCACAATTGAGGAA      | pMUTIN-His-yesG                                           |
| pX-yknV-Spe        | AAACTAGTTGGAAAGGTGCTGGATATG         | pX-yknV                                                   |
| pX-yknV-Bam        | ATGGGATCCATCCGACCTCATGCGGC          | pX-yknV                                                   |
| pX-yesG-Spe        | AAACTAGTCAACATAAAGGAGGAACAATAG      | pX-yesG                                                   |
| pX-yesG-Bam        | ATGGGATCCCTCAGCTCCACAATTGAGGAAG     | pX-yesG                                                   |
| yesG-FF            | TCCGGGCTTGCCTGATT                   | OAM1032                                                   |
| yesG-FR            | CCAGTTCACGTTACGTGCCATCAGCAATGACCAGC | OAM1032                                                   |
| yesG-RF            | CTAATTGGTAATCAGAGCGCTCGGAACGCTGCTT  | OAM1032                                                   |
| yesG-RR            | CAATATGGATCGGCCCTC                  | OAM1032                                                   |
| Spc-F              | ACGTAACGTGACTGGCAAGA                | OAM1032                                                   |
| Spc-R              | CTGATTACCAATTAGAATGAAT              | OAM1032                                                   |
| pIS-argG-E         | ATGGAATTCGCGGCGTCAATTCAGC           | EMSA, pIS284-argG                                         |
| pIS-argG-B         | TTCGGATCCGATAAAAAATCCCTCTCAACCG     | pIS284-argG                                               |
| pIS-argC-B         | ATGGGATCCATTATGCTCGGGGCTTTC         | EMSA, pIS284-argC                                         |
| pIS-argC-H         | TTGAAGCTTCCCTTCTCCGCTGGATGAATAA     | pIS284-argC                                               |
| pIS-pyrR-F(E)      | ATTGAATTCGAACCCATCAAAATTCGTGTTC     | EMSA, pIS284-pyrR                                         |
| pIS-pyrR-R(B)      | TTCGGATCCTGTGTGACACCTCACAGTTTAT     | pIS284-pyrR                                               |
| pIS-dhbA-E         | ATCGAATTCAGCCGATGAATGATAATGC        | pIS284-dhbA                                               |
| pIS-dhbA-H         | CGGAAGCTTATCATCAATTTCTTCTCGCTCT     | pIS284-dhbA                                               |
| pIS-feuA-E         | ATCGAATTCACACCTTCAGAACAAAGCGA       | pIS284-feuA                                               |
| pIS-feuA-H         | CGGAAGCTTCTATAGAGCTCTGTTCAA         | pIS284-feuA                                               |
| pIS-czcD-E         | ATCGAATTCGATGTGCTCAACAAGACC         | pIS284-czcD, EMSA                                         |
| pIS-czcD-B         | CATGGATCCCTTACCTAAAGTTTAA           | pIS284-czcD                                               |
| pIS-mgtE-E         | ATCGAATTCAGGCTGAATATGTCCCTC         | pIS284-mgtE, EMSA                                         |
| pIS-mgtE-B         | CATGGATCCGGGACTCGTACCTCTC           | pIS284-mgtE                                               |
| pIS-hom-B          | ATCGGATCCGCTGTCTTCAATTTTCGAAAC      | pIS284-hom, EMSA                                          |
| pIS-hom-H          | TTCAAGCTTAAAAATCCACCTTTCTTTGATTG    | pIS284-hom                                                |
| mntH-bio-F         | biotin-TCCCGGCCATCATCGGG            | EMSA                                                      |
| gcp-bio (thiL)     | biotin-ACACCCGTTCCCATACCGAACA       | EMSA                                                      |
| pDG1729-gcp-B2     | ATTGGATCCGTTTACATTAATGGCGGTCCGG     | EMSA                                                      |
| RapH-bio           | biotin-CAACCTCCGCTTTCAGAATC         | EMSA                                                      |
| RapH-F1            | CCCTTGCATAAAGGGTTC                  | EMSA                                                      |
| pMUT-His-PyknU-F-E | CGCGAATTCCTTTATTTGACAGGCTTG         | EMSA                                                      |
| yknU-bio-R         | biotin-CACCTTTCTGTACGGCCAAT         | EMSA                                                      |

|                    |                                     |                         |
|--------------------|-------------------------------------|-------------------------|
| argC-Bio-R         | biotin-CCCTCTTGGTCTTTGTGAAA         | EMSA                    |
| ydfM-bio-R         | biotin-TCCTATAAAACTGCACAAAAAAA      | EMSA                    |
| mneS-bio-F         | biotin-GCGCTTTCAGCGAATGTGTG         | EMSA                    |
| mneS-R             | CAGTTCATCATATCTCTCCATAC             | EMSA                    |
| mneP-bio-F         | bioin-TTCACACAGCATGGTTAAGAAA        | EMSA                    |
| mneP-bio-R3        | biotin-GCAACTTTTCTGCTTATTGTTC       | EMSA                    |
| yesF-H2-bio        | biotin-TTCCGAATTTTTGAACTTTATTCA     | EMSA (del6)             |
| yesF-E3b-bio       | biotin-TTCTGACAAAAGTATTTACAAAAGT    | EMSA (del7, del8)       |
| yesF-R2            | CCCTCCTGCCAAAAGCAA                  | EMSA (del1, del4, del8) |
| yesF-bio-F         | biotin-TCGGCTTTACAATGGAGAATG        | EMSA (del1)             |
| yesF-E3aa-bio      | biotin-TTTAGTTTGGCAGGTTTTATTCT      | EMSA (del4, del5)       |
| pIS-ytgA-E         | ATCGAATTCACACAGCATGGTTAAGAAA        | EMSA                    |
| ytgA-bio-F         | biotin-TTCACACAGCATGGTTAAGAAA       | EMSA                    |
| pyrR-bio-R         | biotin-TGTGTGACACCTCAGATTTCAT       | EMSA                    |
| argG-bio-F         | biotin-CTGCCGGCGTCATTTCAGC          | EMSA                    |
| dhbA-bio-F         | biotin-AGCCGGATGAATGATAATGC         | EMSA                    |
| dhbA-R             | ATCATCAATTCTTTCTTCGCTCT             | EMSA                    |
| czcD-R-Bio         | biotin-TCCTCCTTACCTAAAGTTTTTAA      | EMSA                    |
| mgfE-R-Bio         | biotin-CGGGACTCGTACCTCCTC           | EMSA                    |
| skfA-F             | GTCAATCTATTAGGCATCAGAA              | EMSA                    |
| skfAR-bio-R        | biotin-TCATAAGTAAACCTCCTCTC         | EMSA                    |
| ktrA-F             | GACTCAGCCTTGCGGTTG                  | EMSA                    |
| ktrA-R-bio         | biotin-TGTTTCATATCTCCCTTAGTGAA      | EMSA                    |
| pucR-F             | CAATCTATCACACAGGAAA                 | EMSA                    |
| pucR-bio-R         | biotin-CATAGCGCATTCTCCTTTTC         | EMSA                    |
| spoIIE-F           | CTTTCACGGCGGTAACACGG                | EMSA                    |
| spoIIE-bio-R       | biotin-GAGTTTTTCCAAGCTTGTC          | EMSA                    |
| spoIIA-F2          | GGCCAAGAGCTTGGCACTCTT               | EMSA                    |
| spoIIA-R-bio       | biotin-CTTGATATGATCGGATAATGAGTG     | EMSA                    |
| artP-F             | GAAGGCCATGAGCCGATG                  | EMSA                    |
| artP-bio-R         | biotin-GATCCATTTCCTCCGATTC          | EMSA                    |
| hom-bio            | biotin-AAAAACTCCACCTTTCTTTTGATTG    | EMSA                    |
| frlB-F-Eco         | CTGGAATTCACCGATCAAACATCACAG         | EMSA                    |
| frlB-R-bio         | biotin-CTCAAATCCTTCACTCCTCG         | EMSA                    |
| feuA-bio-F         | biotin-CACACCTTCAGAACAAGCGA         | EMSA                    |
| feuA-R             | CTATAGAGCCTCCTGTCAA                 | EMSA                    |
| pIS-hisZ-E         | ATTGAATTCGCTGAAAAGAATCATCAGG        | EMSA                    |
| hisZ-bio-R         | biotin-ATCTCTCATGCCGTGCGG           | EMSA                    |
| pftA-bio-F         | biotin-CGGTCAGCGATACACTCG           | EMSA                    |
| kimA-F             | GGTAAGTAAATTCATTTGTGGAAC            | EMSA                    |
| kimA-R-bio         | biotin-CGATGCTTCCCTTTTAATTTCTC      | EMSA                    |
| pftA-R             | GCACTCATTTTCTTCACTCTTTC             | EMSA                    |
| pGEX-mntR-B        | CCGGGATCCATGACAACACCAAGTATGGA       | pGEX4T-1-mntR           |
| mntR-chitin-R (Xh) | TTGCTCGAGTTACTGATTATGATGTTCTGTTTTTC | pGEX4T-1-mntR           |
| ahrC-His-B         | ATTGGATCCATGAACAAAGGCCAGAGGC        | pGEX4T-1-ahrC           |
| ahrC-chitin-R (Xh) | TTGCTCGAGTTACAGCAGTTCAAGGAGCC       | pGEX4T-1-ahrC           |

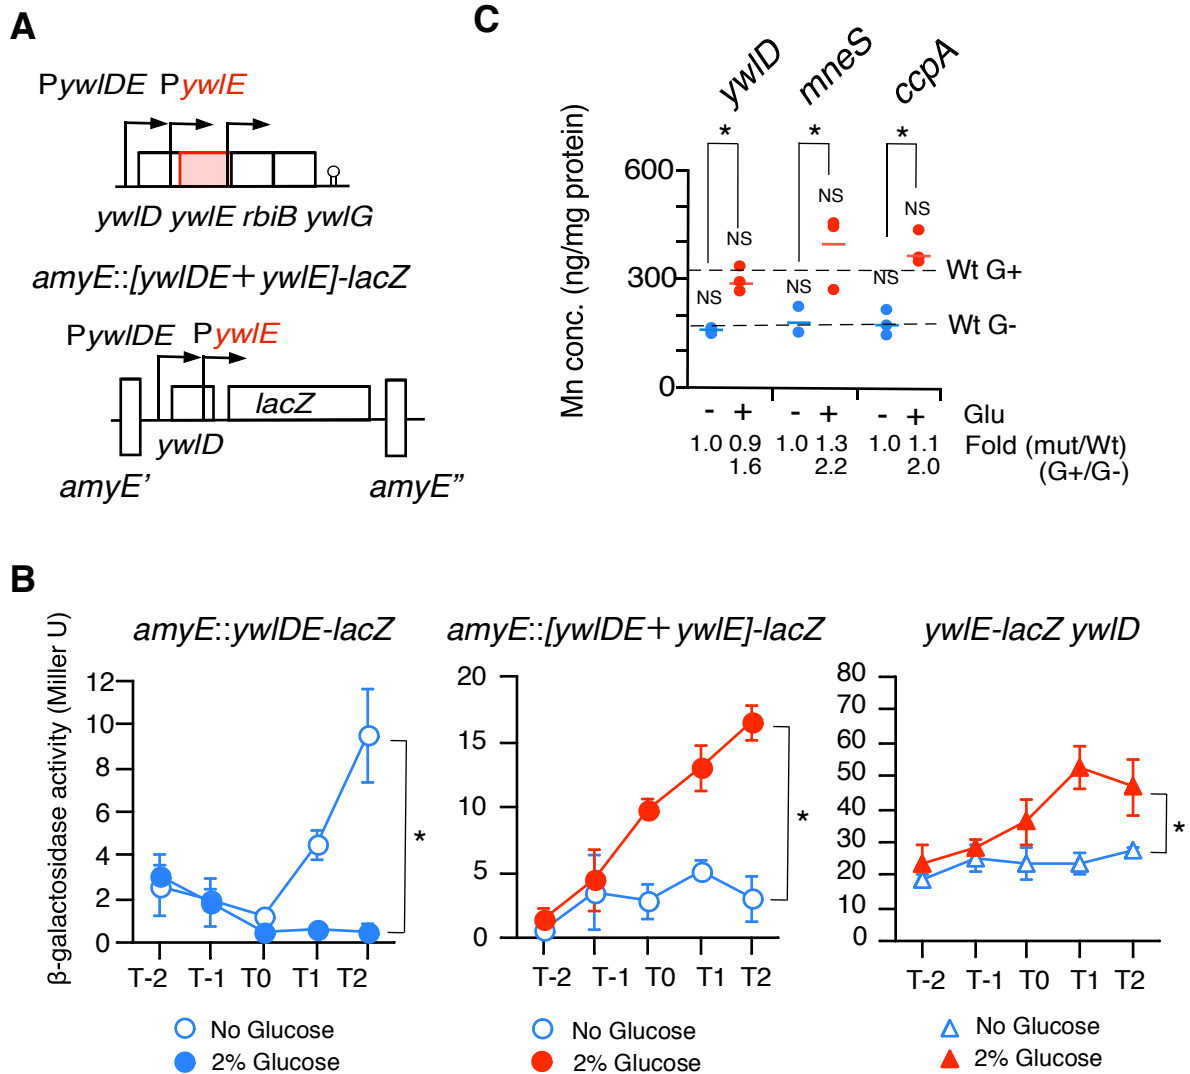

**Fig. S1. YwID is not involved in glucose induction of *ywIE* expression and cellular Mn concentrations.** (A) Schematic representations of the region surrounding *ywIE* and the structure of [*ywIDE*+*ywIE*]-*lacZ* at *amyE*. Box, bent arrows, and stem-loop show open reading frame, promoter, and terminator, respectively. (B) Expression of *ywIDE*-*lacZ* (OAM1013), [*ywIDE*+*ywIE*]-*lacZ* (OAM1082) and *ywIE*-*lacZ* in *ywID* disruptant (OAM1008).  $\beta$ -Galactosidase activities were shown in Miller units. Means from three independent experiments and the standard deviations are shown. The *x*-axis represents the growth time in h relative to the end of vegetative growth (T0). Cells were grown in sporulation medium with (closed symbols) or without (open symbols) 2% glucose and sampled hourly. Substrate CPRG was used for *ywIE*-*lacZ* and [*ywIDE*+*ywIE*]-expression. Significant differences in the effects of glucose addition at T2 were determined using nonpaired t-test. \*  $P < 0.05$ . (C) Cellular Mn concentrations. T2 cells grown in sporulation medium were harvested and processed. Strains; *ywID* (OAM997), *mneS* (OAM994), *ccpA* (TF10). “Glu” represents glucose. Three biologically independent samples were measured. Significant differences between Wt and mutants, with or without glucose (\* and “NS” above each data point indicate  $P < 0.05$  and no significant difference, respectively) and the effect of glucose addition to each strain were determined using nonpaired t-test. \*  $P < 0.05$ ; NS, no significant differences. The short horizontal lines show means of the shown data points.



**A**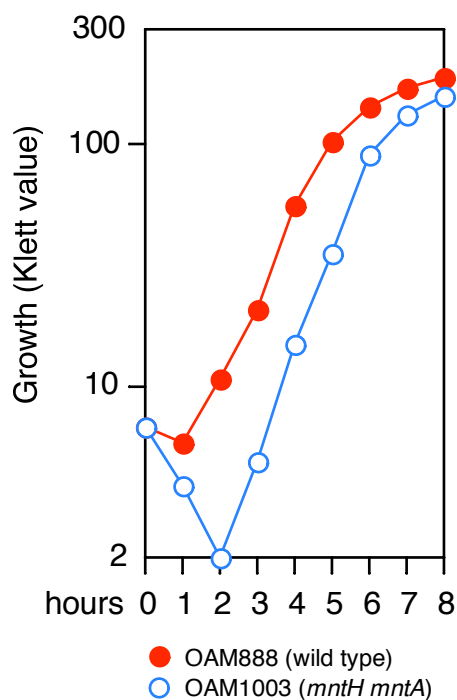**B**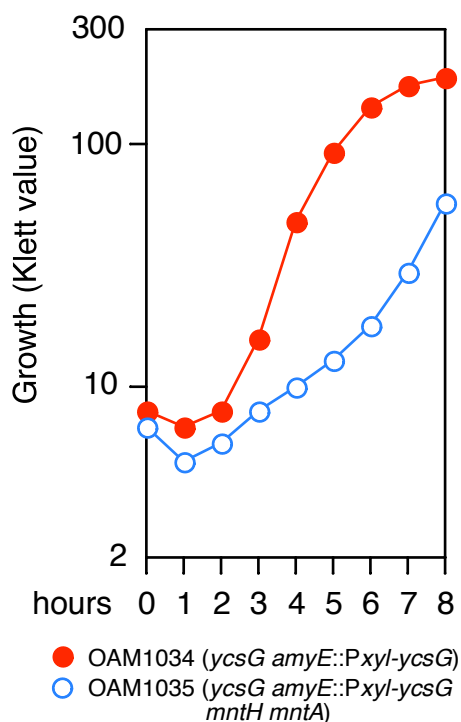**C**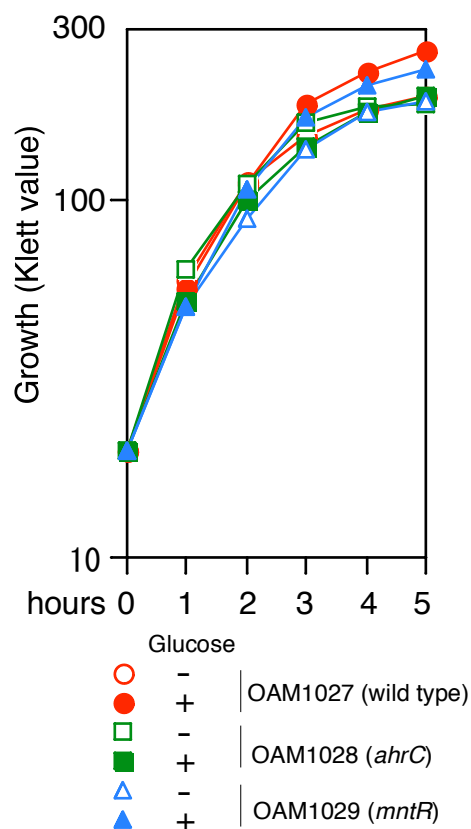

**Fig. S2. Cell growth profiles in various mutants.** Typical cell growth profiles monitored with a Klett calorimeter (Fisher Scientific, Waltham, MA, USA) are shown. **(A)** and **(B)** Overnight culture grown in LB medium (Difco, MI, USA) was washed with semisynthetic MC medium (100 mM potassium phosphate [pH 7], 3 mM trisodium citrate, 3 mM MgSO<sub>4</sub>, 2% glucose, 22mg/mL ferric ammonium citrate, 50 mg/mL tryptophan, 0.1% casein lysate, 0.2% potassium glutamate) (30) and inoculated to 4 mL MC medium in an L-tube. **(C)** Cells grown on LB agar plate were inoculated to 50 mL sporulation medium with or without 2% glucose.

**A**● Wt   ■ *ahrC*   ▲ *mntR*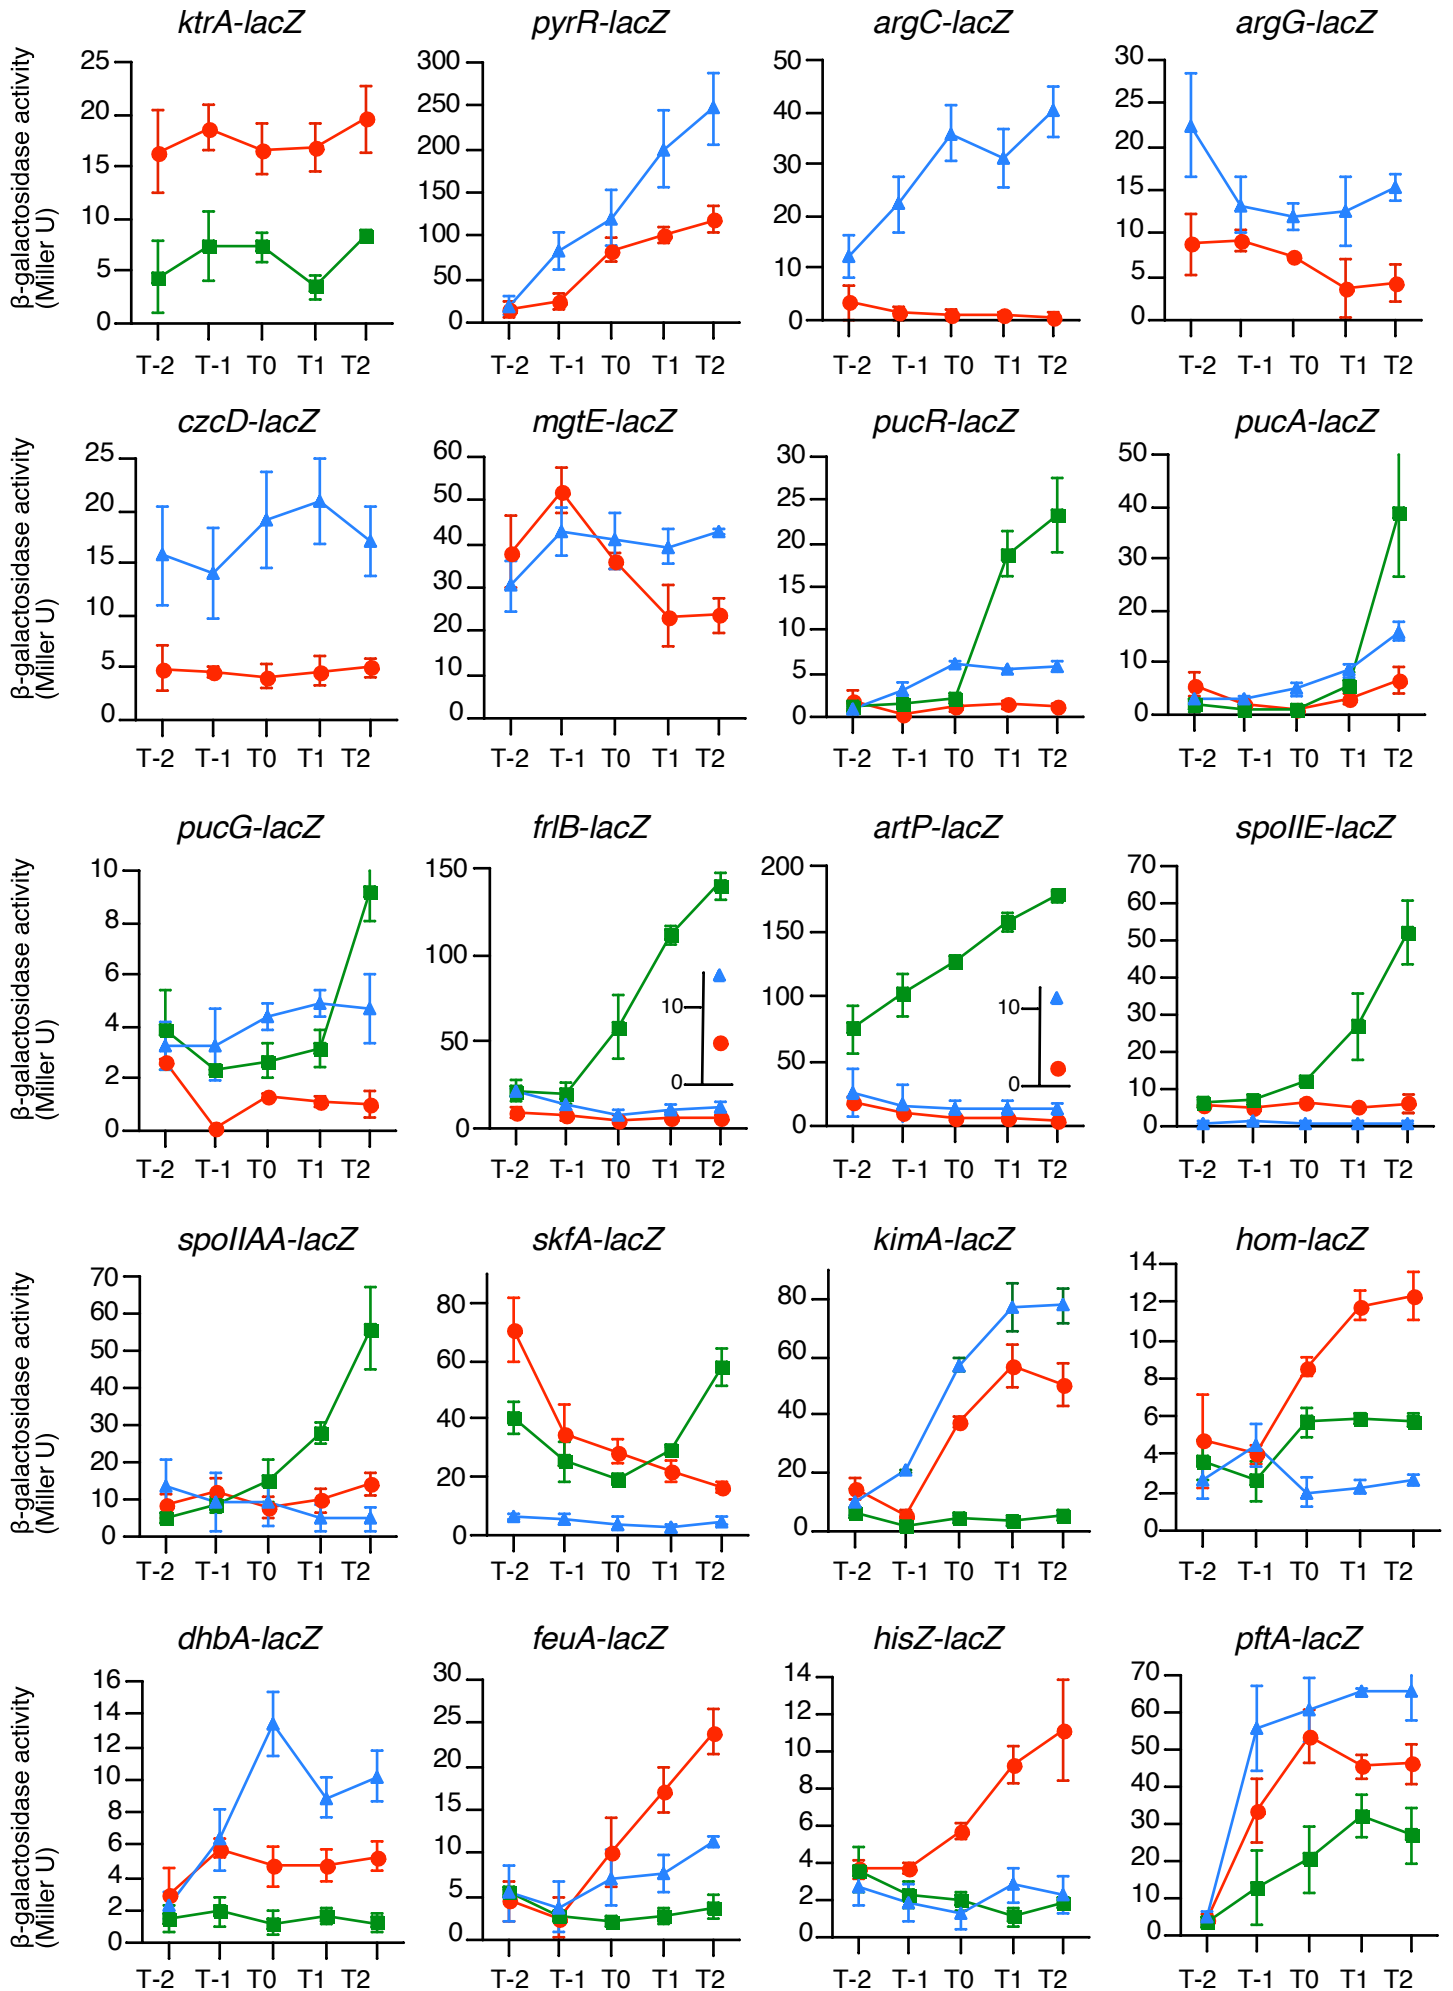

Fig. S3A

**B**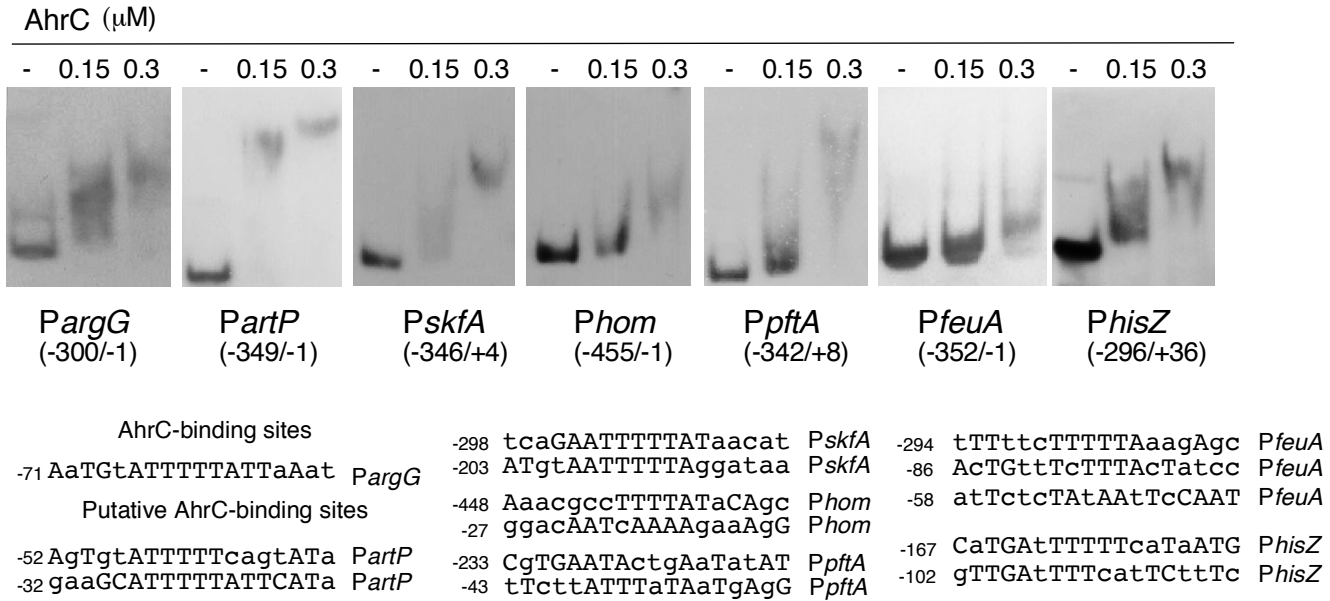**MntR ( $\mu\text{M}$ )**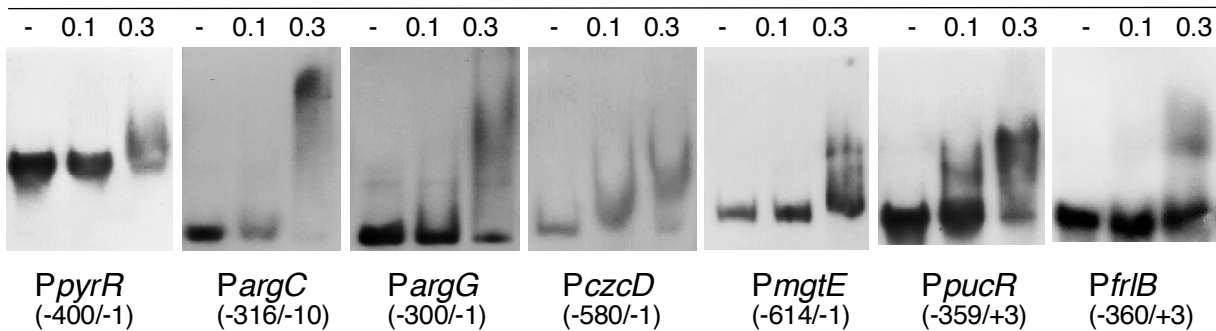**MntR ( $\mu\text{M}$ )**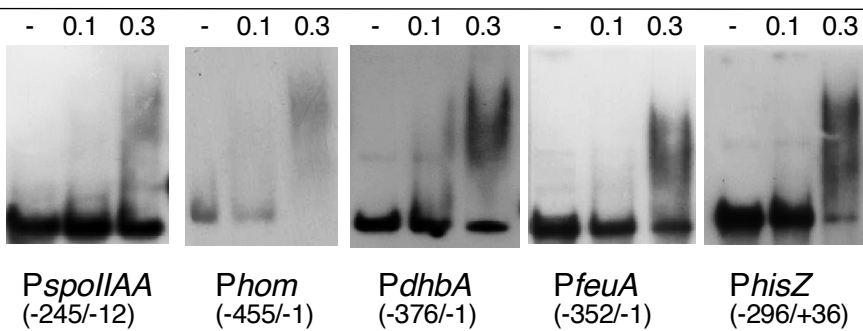**C**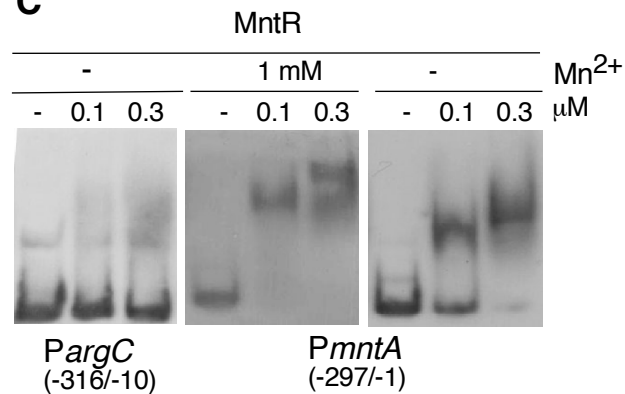**Fig. S3. Expression analysis and AhrC/MntR-binding of the various promoters**

**detected by RNA-Seq.** (A)  $\beta$ -Gal analysis.  $\beta$ -Galactosidase activities were shown in Miller units. Means from three independent experiments and the standard deviations are shown. The  $x$ -axis represents the growth time in h relative to the end of vegetative growth (T0). Cells were grown in sporulation medium with 2% glucose and sampled hourly. Red circles, green squares, and blue triangles show wild type, *ahrC* disruptant, and *mntR* disruptant, respectively. Substrate CPRG was used for *argC-lacZ* and *ktrA-lacZ* expression. The negative effects of the *mntR* disruption on *dhbA* and *kimA* were observed in the RNA-Seq analyses, whereas the positive effects were seen in the  $\beta$ -Gal analysis due to an unknown reason. Since some strains have a strong tendency to develop suppressor mutations after long incubation, the strains were immediately used

after construction of the strains. Strains. *ktrA-lacZ*, YUAAAd (Wt), OAM1078 (*ahrC*); *pyrR-lacZ*, OAM825 (Wt), OAM1036 (*mntR*); *argC-lacZ*, OAM1037 (Wt), OAM1038 (*mntR*); *argG-lacZ*, OAM1039 (Wt), OAM1040 (*mntR*); *czcD-lacZ*, OAM1073 (Wt), OAM1074 (*mntR*); *mgtE-lacZ*, OAM1075 (Wt), OAM1076 (*mntR*); *pucR-lacZ*, OAM1045 (Wt), OAM1046 (*ahrC*), OAM1047 (*mntR*); *pucA-lacZ*, OAM1048 (Wt), OAM1049 (*ahrC*), OAM1050 (*mntR*); *pucG-lacZ*, OAM1051 (Wt), OAM1052 (*ahrC*), OAM1053 (*mntR*); *frlB-lacZ*, OAM914 (Wt), OAM1063 (*ahrC*), OAM1064 (*mntR*); *artP-lacZ*, OAM1060 (Wt), OAM1061 (*ahrC*), OAM1062 (*mntR*); *spoIIE-lacZ*, OAM1054 (Wt), OAM1055 (*ahrC*), OAM1056 (*mntR*); *spoIIAA-lacZ*, OAM1057 (Wt), OAM1058 (*ahrC*), OAM1059 (*mntR*); *skfA-lacZ*, OAM1043 (Wt), OAM1087 (*ahrC*), OAM1044 (*mntR*); *kimA-lacZ*, OAM1079 (Wt), OAM1080 (*ahrC*), OAM1081 (*mntR*); *hom-lacZ*, OAM1083 (Wt), OAM1084 (*ahrC*), OAM1085 (*mntR*); *dhbA-lacZ*, OAM1041 (Wt), OAM1086 (*ahrC*), OAM1042 (*mntR*); *feuA-lacZ*, OAM1065 (Wt), OAM1066 (*ahrC*), OAM1067 (*mntR*); *hisZ-lacZ*, OAM838 (Wt), OAM1068 (*ahrC*), OAM1069 (*mntR*); *pftA-lacZ*, OAM1070 (Wt), OAM1071 (*ahrC*), OAM1072 (*mntR*). Significant differences in the effects of *ahrC* or *mntR* disruption at T2 in the presence of glucose were determined using nonpaired t- test. As all the cases exhibited significant differences ( $P < 0.05$ ), these are not indicated in the Figure. **(B)** EMSA (electromobility shift assay). Concentrations of proteins and probe names are shown. Numbers in parentheses show nucleotides position to the relative to the translation start point. Putative AhrC-binding sites are shown. **(C)** MntR-binding with or without  $Mn^{2+}$ .

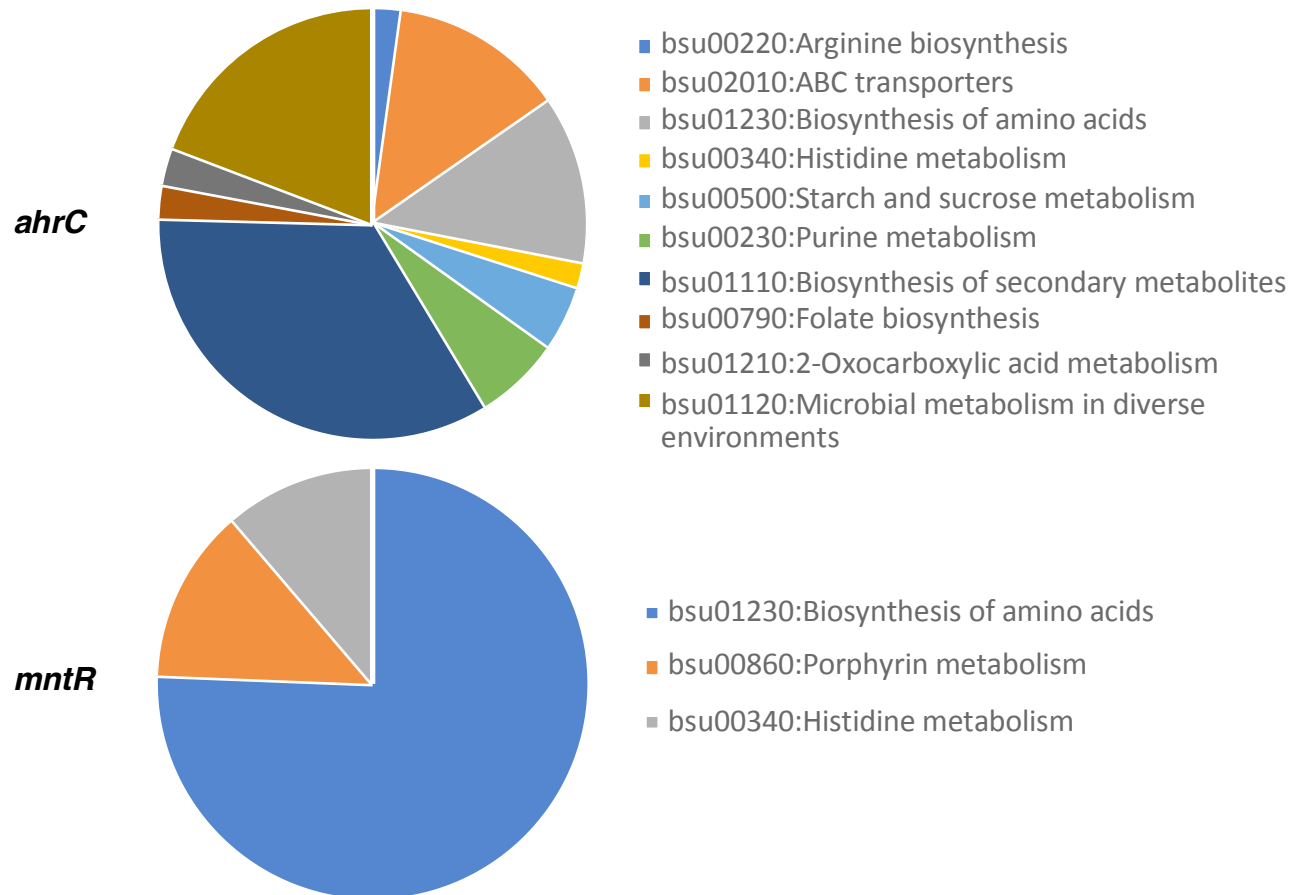

**Fig. S4. Enrichment analysis of AhrC for Gene Ontology and KEGG pathway.** The analyses were performed using DAVID server (<https://david.ncifcrf.gov/>). DEGs were used as input for enrichment analysis, and considered as enrichment pathways with significant thresholds of false discovery rate adjusted p-value (FDR) < 0.05.

**A**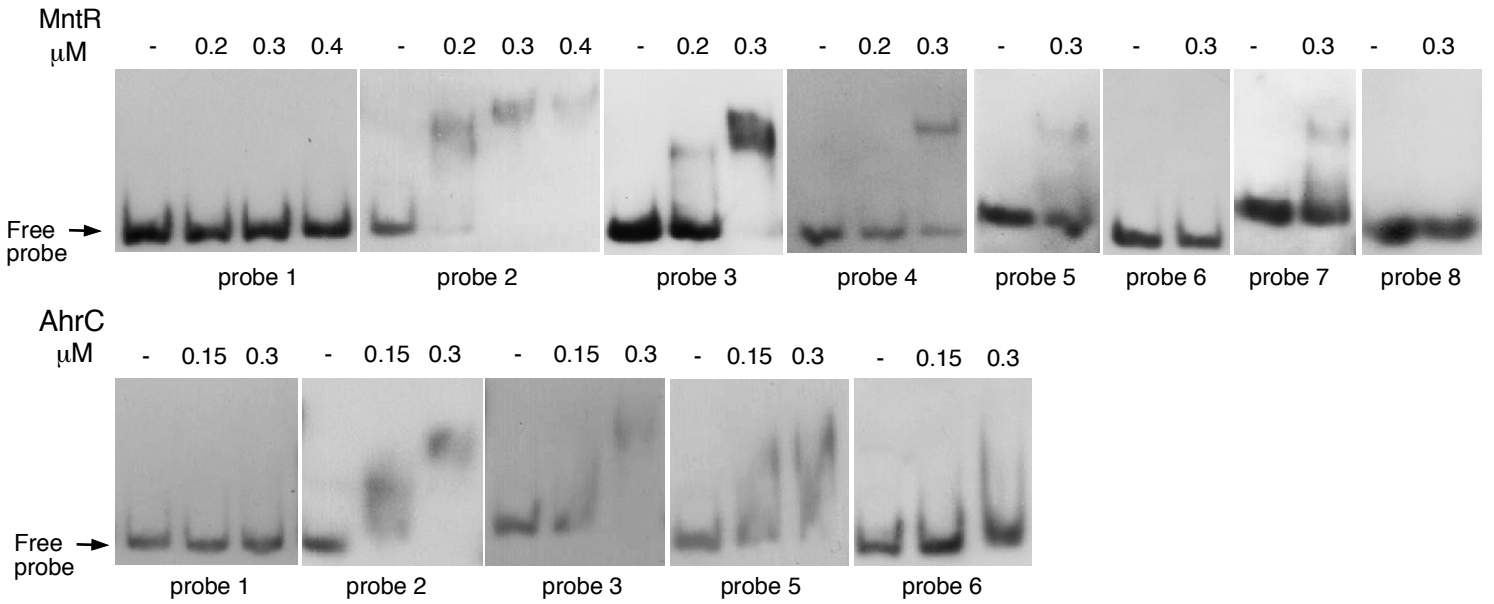**B**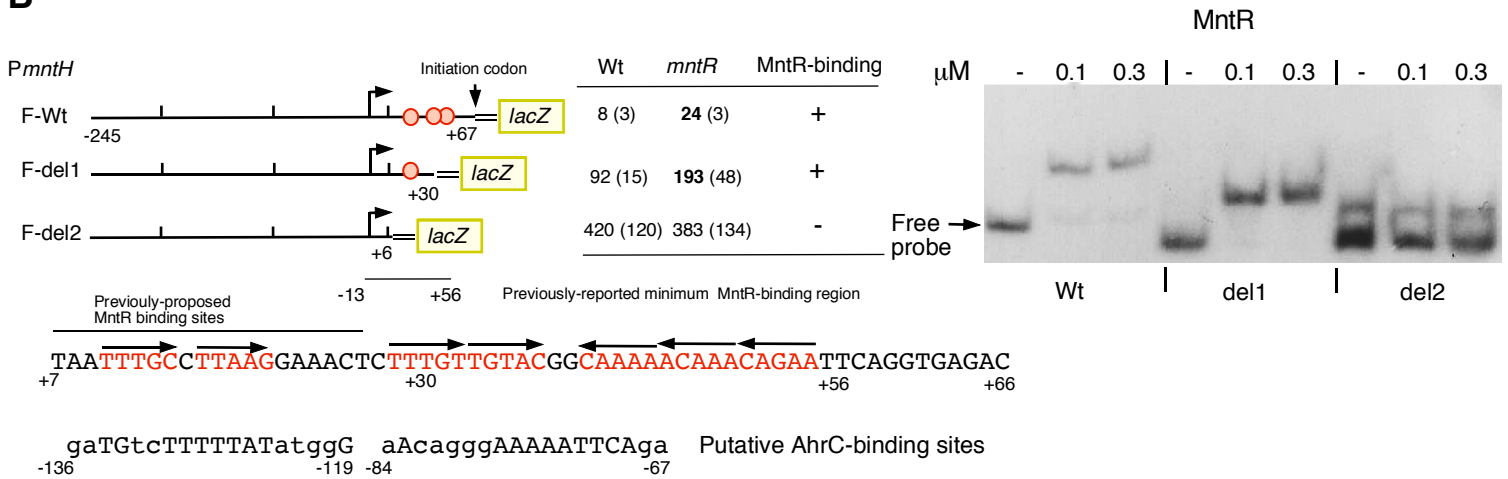**C**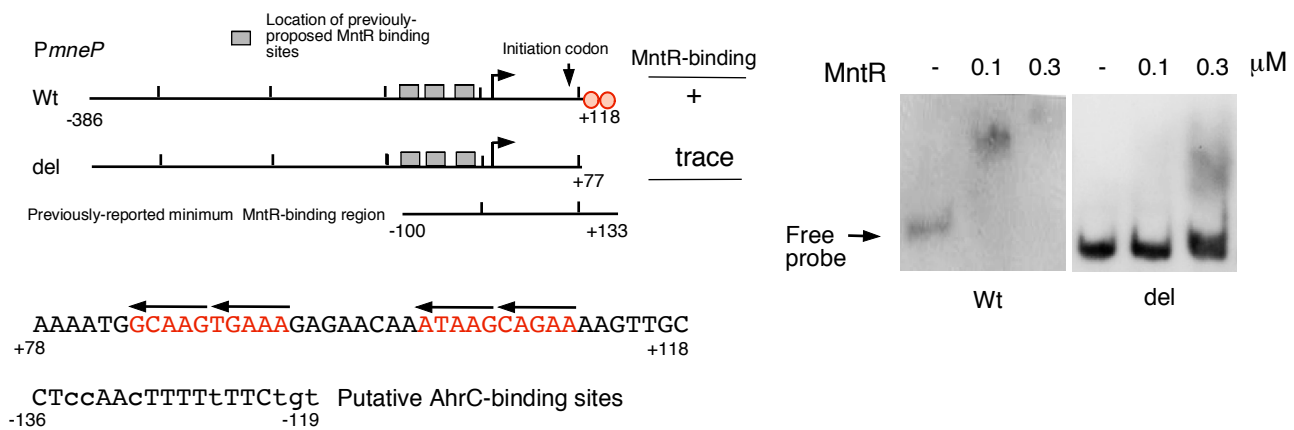**D**Putative AhrC-binding sites in *mneS*

tTgcgtTTTTTATTCgct -211 -194 -127 ATgGgATTTTTggcgggA -110 -113 ggaGcAaAtAAATTggAT -96

Putative AhrC-binding sites in *mntA*

ggTtAAgAAAAaGCAtT -169 -152 +20 tgTaaATAAAaTgctT +37

Fig. S5

**Fig. S5. EMSA Results and expression of *mntH-lacZ*** (A) EMSA images in Fig. 6B. Protein concentrations and probe names are shown. (B) and (C) Expression analysis of *mntH* and EMSA of *mntH* and *mneP*. Strains were grown in sporulation medium with 2% glucose and sampled hourly. Means of peak values (Miller units) from three independent experiments and the standard deviations are shown in parenthesis. Numbers in bold letter indicate statistically significant differences (Comparison between wild and disruptant;  $P < 0.05$ ). Bent arrow and double line show promoter and vector sequence, respectively. Numbers along the line indicate position relative to the transcription start site (22, 23). The reported minimum MntR binding regions are shown (22, 23). Strains, F-Wt, OAM1113 (wild); OAM1114 (*mntR*); F-del1, OAM1115 (wild); OAM1116 (*mntR*); F-del2, OAM1117 (wild); OAM1118 (*mntR*). Putative MntR-binding sequences are shown in red letters. These sequences for AhrC were within the probe region used in Fig. 2A. (D) Putative AhrC-binding sites in *mneS* and *mntA*. Numbers along the line indicate position relative to the transcription start site (22, 23). These sequences were within the probe region used in Fig. 2A.

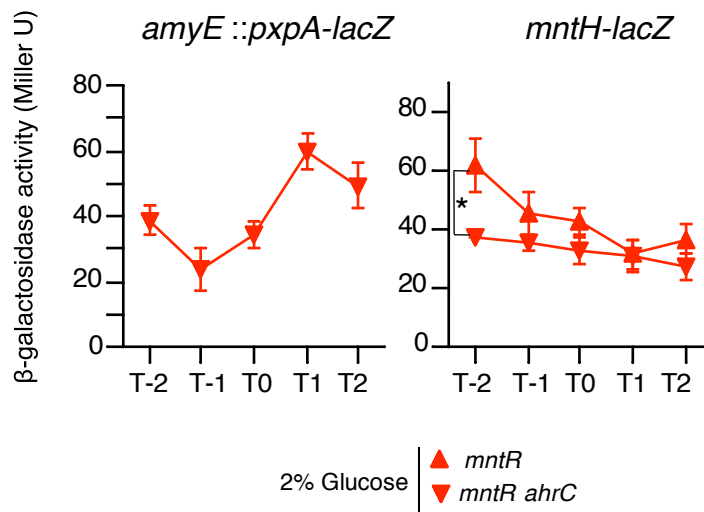

**Fig. S6 Expression of *P pxpA* and *P mntH* in *ahrC mntR* disruptant.** Strains were grown in sporulation medium with 2% glucose and sampled hourly. Means (Miller units) from three independent experiments and the standard deviations are shown. \*  $P < 0.05$ . The  $x$ -axis represents the growth time in h relative to the end of vegetative growth (T0). When the peak values of *PpxpA-lacZ* in the *ahrC* or *mntR* disruptant (Fig. 5B) was compared to that in double disruptant, statistically significant difference was observed ( $P < 0.05$ ). Strains, OAM1030 (*PpxpA-lacZ*, *mntR ahrC*), OAM1022 (*PmntH-lacZ*, *mntR*), OAM1023 (*PmntH-lacZ*, *mntR ahrC*).
